# Supplementary material for: ETS Proteins Bind with Glucocorticoid Receptors: Relevance for Treatment of Ewing Sarcoma
Source: PubMed Central journal article supplement — Cell Rep. 2019 Oct 1;29(1):104–117.e4. doi: 10.1016/j.celrep.2019.08.088 (PMC6899513; doi:10.1016/j.celrep.2019.08.088), 2019-10-01
Supplement: mmc1.pdf [file mmc1.pdf]

## Supplemental Information

### **ETS Proteins Bind with Glucocorticoid Receptors:**

### **Relevance for Treatment of Ewing Sarcoma**

**Swati Srivastava, Nishanth Belugali Nataraj, Arunachalam Sekar, Soma Ghosh, Chamutal Bornstein, Diana Drago-Garcia, Lee Roth, Donatella Romaniello, Ilaria Marrocco, Eyal David, Yuval Gilad, Mattia Lauriola, Ron Rotkopf, Adi Kimchi, Yuya Haga, Yasuo Tsutsumi, Olivier Mirabeau, Didier Surdez, Andrei Zinovyev, Olivier Delattre, Heinrich Kovar, Ido Amit, and Yosef Yarden**

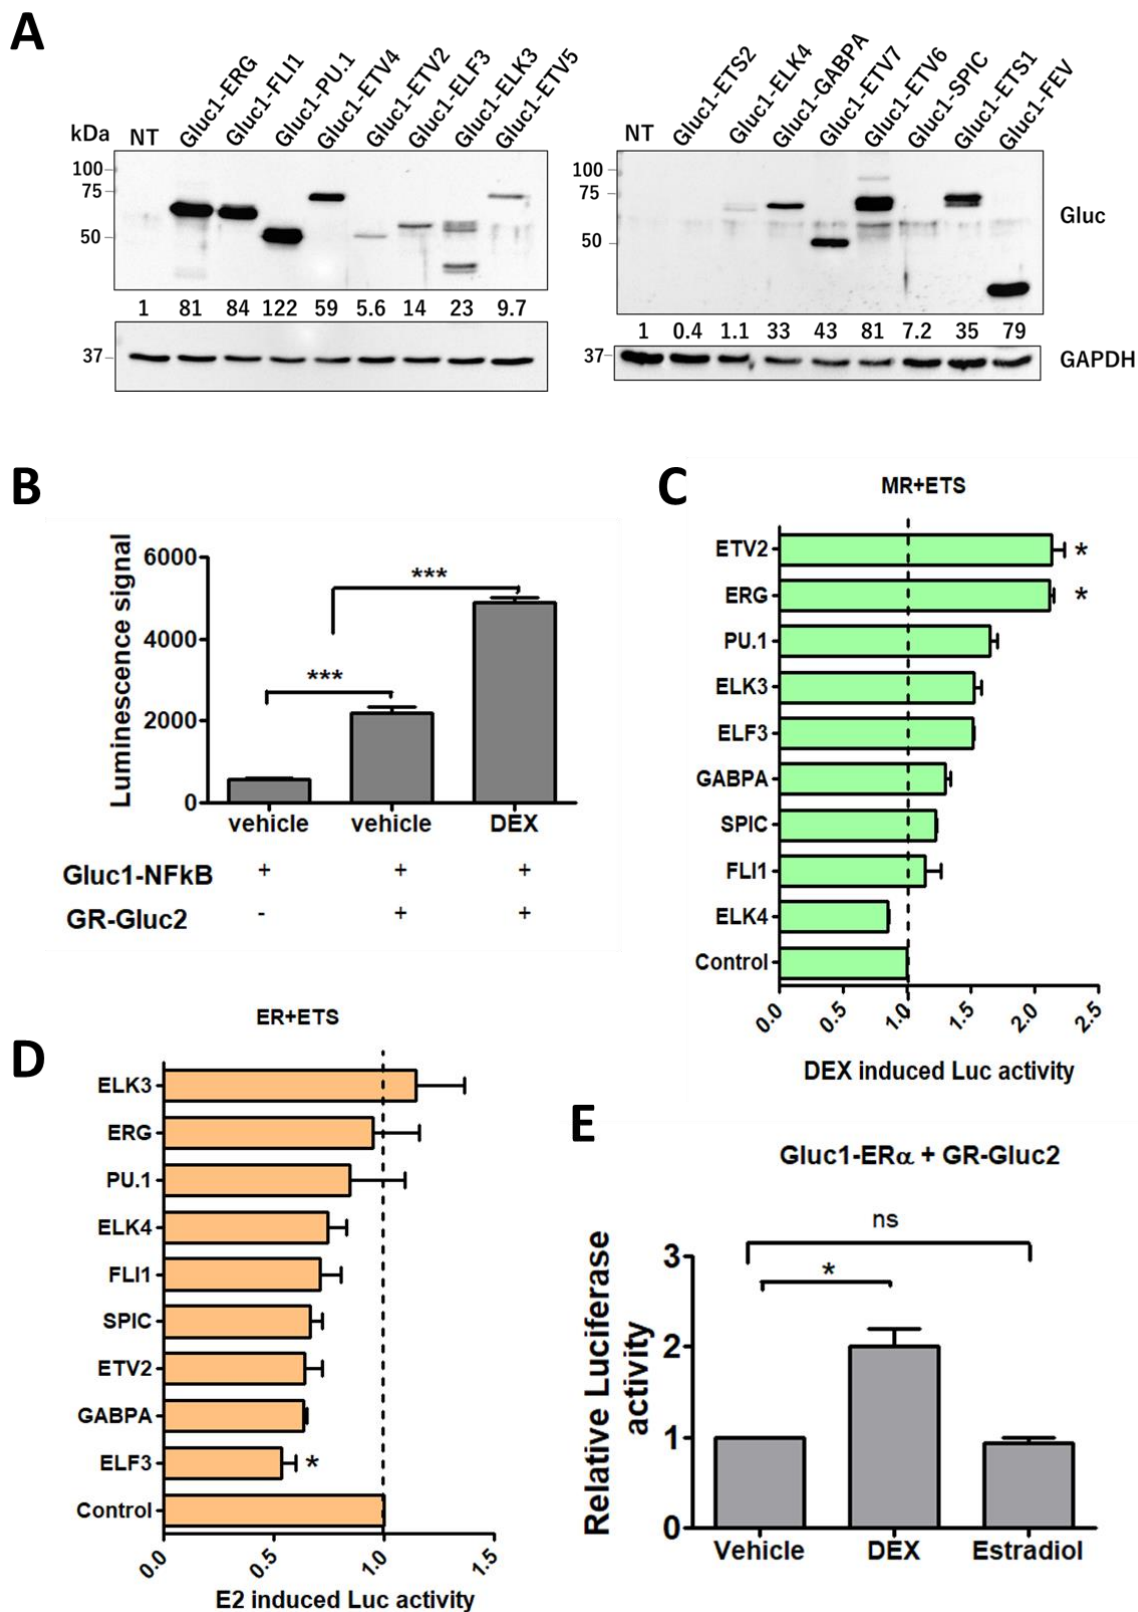

Supplementary Figure S1 (related to Figure 1): Specificity of interactions between steroid

**hormone receptors and ETS family members.** (A) HEK293T cells ( $10^6$ ) were transfected with a Gluc1 plasmid encoding the indicated ETS fusion protein. Twenty-four hours later, cell extracts were subjected to immunoblotting with the indicated antibodies. Protein expression levels were quantified and normalized to GAPDH (numbers indicated under each lane). *NT*, untransfected cells. (B) HEK293T cells ( $6 \times 10^3$ ) were seeded in 96-well plates. On the next day, cells were transfected with combinations of the Gluc1 plasmid encoding a fused, full length NF- $\kappa$ B and the Gluc2 plasmid encoding a fused GR protein. After 24 hours, cells were starved overnight for serum factors, and thereafter they were treated for 60 minutes with vehicle or with DEX (1  $\mu$ M). The cells were later extracted and luminescence was determined in biological triplicates. The bar plot shows luciferase activity in arbitrary units. \*\*\*,  $p < 0.001$ . (C and D) HEK293T cells ( $6 \times 10^3$ ) were seeded in 96-well plates. On the next day, cells were transfected with combinations of the Gluc1 plasmid encoding an ETS protein and a Gluc2 plasmid encoding either MR (C) or ER $\alpha$  (D). Twenty-four hours later, cells were starved overnight for serum factors and thereafter they were treated for 60 minutes with vehicle, DEX (1  $\mu$ M) or estradiol (E2; 10 nM). Cells were then lysed and luminescence was determined. The bar plot shows the fold changes in luciferase activity in response to DEX or E2 (as compared to vehicle-treated cells) for each set of interactions between an ETS family TF and a steroid hormone receptor. Luminescence of treated cells was normalized to vehicle-treated cells. \*,  $p < 0.05$ . (E) HEK293T cells were co-transfected with Gluc1-ER $\alpha$  and GR-Gluc2. Twenty-four hours later, cells were treated for 60 minutes with either vehicle, DEX (1  $\mu$ M) or estradiol (10 nM). Luminescence of extracted cells was determined in biological duplicates and normalized to cells treated with vehicle only. \*,  $p \leq 0.05$ ; ns, not significant.

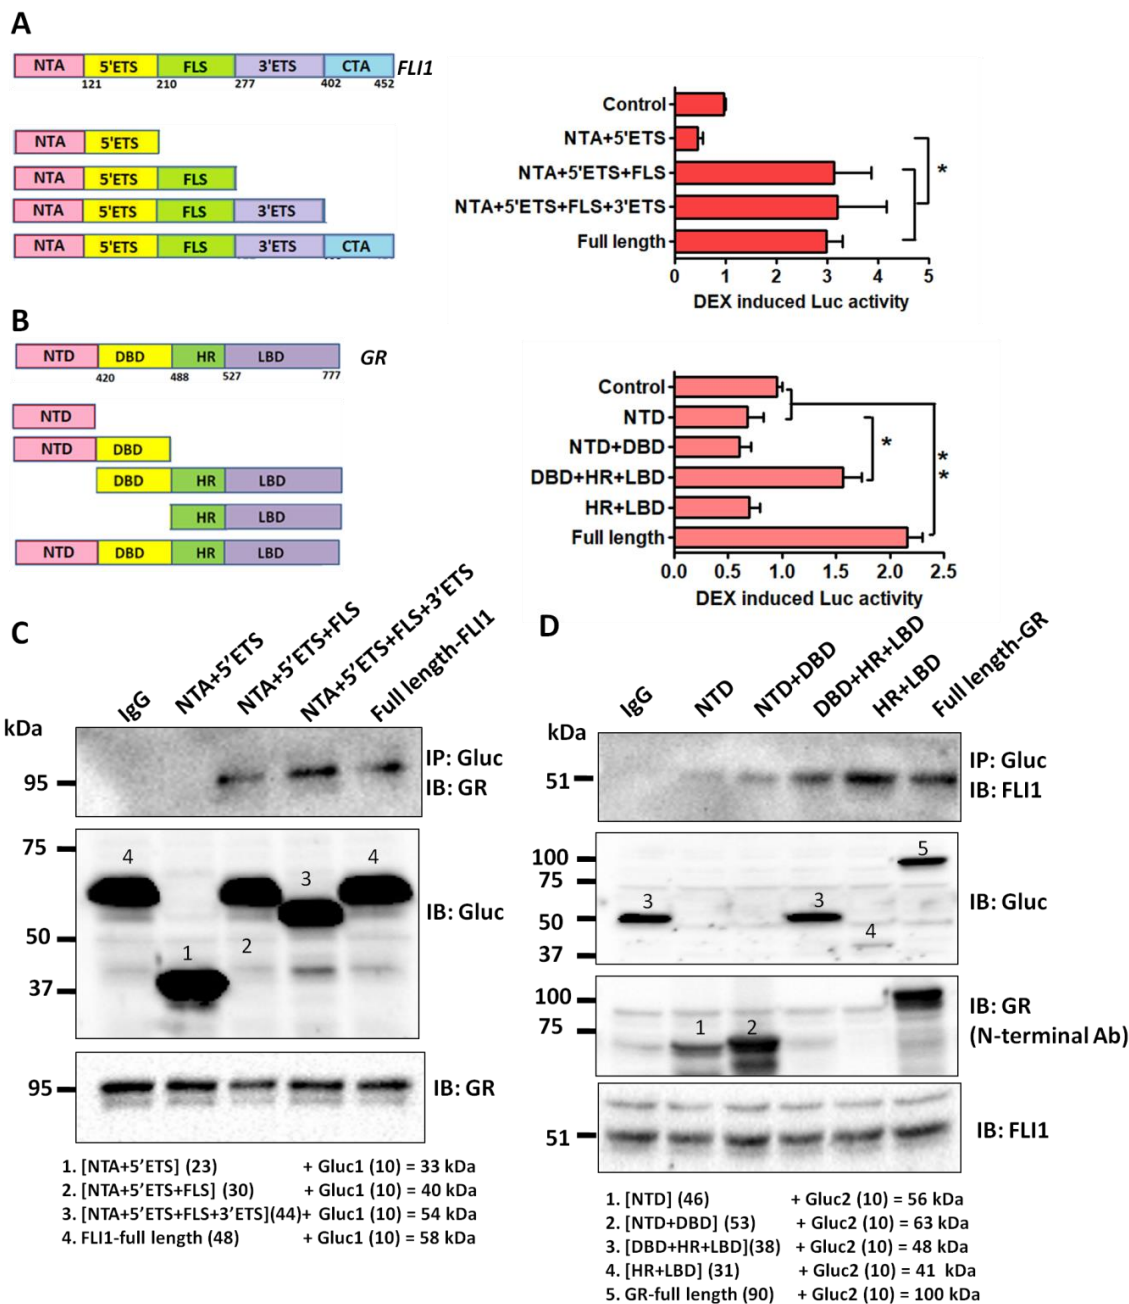

**Supplementary Figure S2: Mapping the mutually interacting domains of FLI1 and GR (related to Figures 1 and 2).** (A and B) Schematic diagrams showing the various domains of FLI1 (A) and GR (B). Different domains of FLI1 were inserted C-terminally to GLuc1. Likewise, individual domains of GR were inserted N-terminally to Gluc2. HEK293T cells ( $6 \times 10^3$ ) were co-transfected with the Gluc1 plasmid encoding different domains of FLI1 and the Gluc2 plasmid encoding full length GR. Alternatively, we used the Gluc2 plasmid encoding

different domains of GR, and the Gluc1 plasmid encoding full length FLI1. After 24 hours, cells were starved overnight and then treated for 60 minutes with vehicle or with DEX (1  $\mu$ M). Luminescence was determined in biological triplicates. The bar plots show the normalized fold changes in luciferase activity induced by DEX. \*,  $p \leq 0.05$ ; \*\*,  $p \leq 0.01$ . (C and D) HEK293T cells were transfected with Gluc1 plasmids encoding different FLI1 domains (C), or Gluc2 plasmids encoding GR domains (D). Gluc proteins were immunoprecipitated (IP) using a specific antibody. Immunoblotting (IB) was performed using antibodies that detected the endogenous forms of GR or FLI1. Blots are representative of three or more biological replicates. Two different antibodies to GR were used. The lowermost panels present immunoblots of whole cell extracts (no prior IP) blotted for the respective endogenous protein, either GR (C) or FLI1 (D). The input of recombinant proteins is shown in the middle panels. Individual fusion proteins are identified by numbers and their molecular weights are shown below each panel. IgG, control immunoglobulin G used for IP. Note that the cells in the IgG panel were transfected with one of the positive interacting constructs, either full length FLI1 (C) or DBD+HR+LBD domain of GR (D).

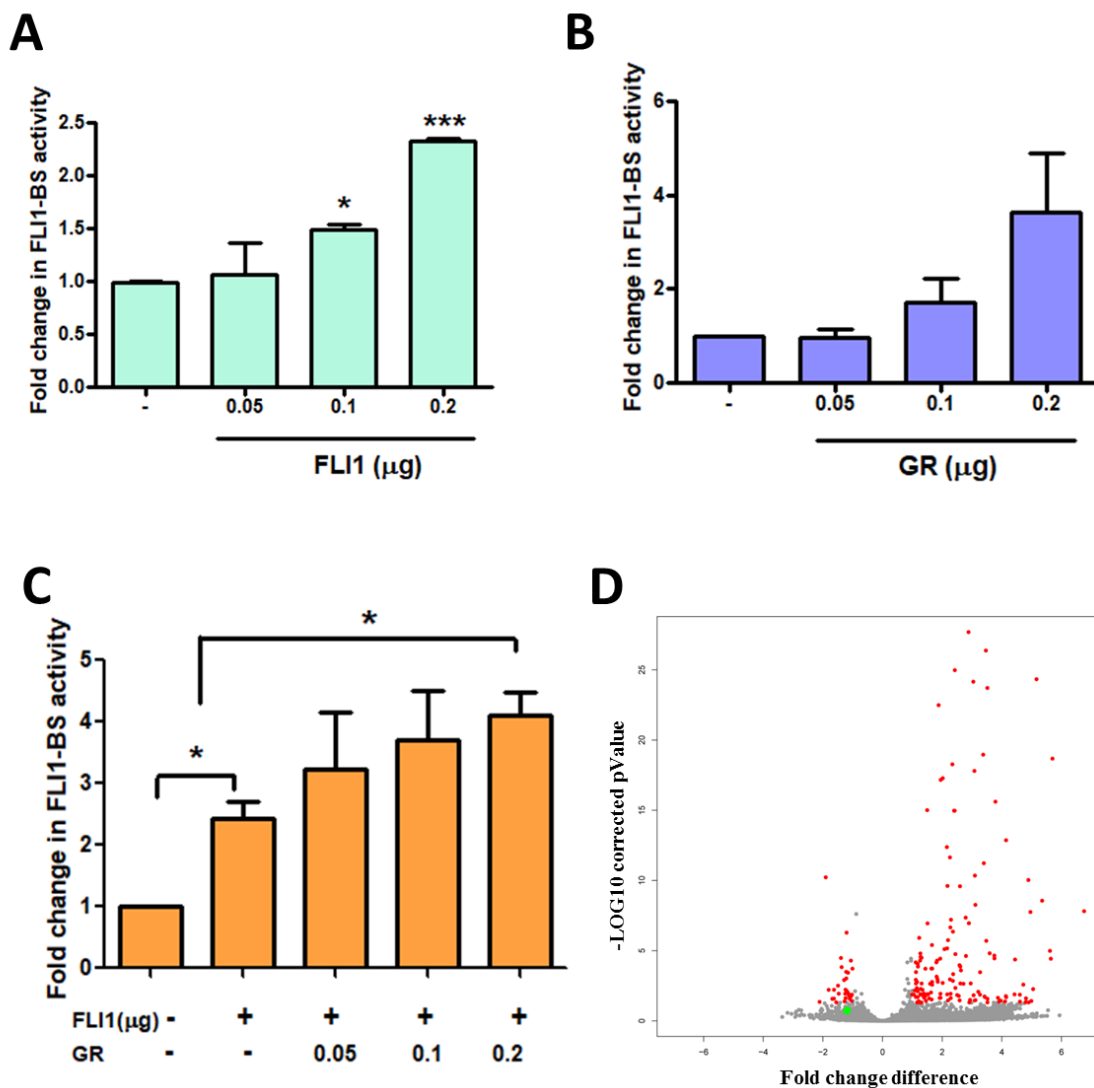

**Supplementary Figure S3 (related to Figures 2 and 3): Transcription regulation by GR and FLI1.** (A-C) HEK293T cells ( $1.2 \times 10^4$ ) were seeded in 48-well plates. On the next day, cells were transfected with the FLI1-BS-luciferase plasmid ( $2.5 \mu\text{g}$ ), along with increasing amounts of either a FLI1 expression vector (A), a GR-encoding vector (B), or a combination of GR and FLI1 plasmids (C). Luciferase activity was determined in biological triplicates 48 hours later and presented in bar plots. Basal activity was determined in cells transfected only with the FLI1-BS reporter. \*,  $p \leq 0.05$ ; \*\*\*,  $p < 0.001$ . (D) A scatter plot (Volcano) of differentially expressed genes in FLI1-depleted Ewing sarcoma cells. A673 cells grown in 90-mm dishes were

transfected in triplicates with siRNA oligonucleotides specific to FLI1, or with control oligonucleotides. Forty-eight hours later, cells were harvested and processed for RNA isolation, which was followed by sequencing. Fold-change differences were plotted against statistical significance. Note the location of the FLI1 gene (in green; see Supplementary Table S3).

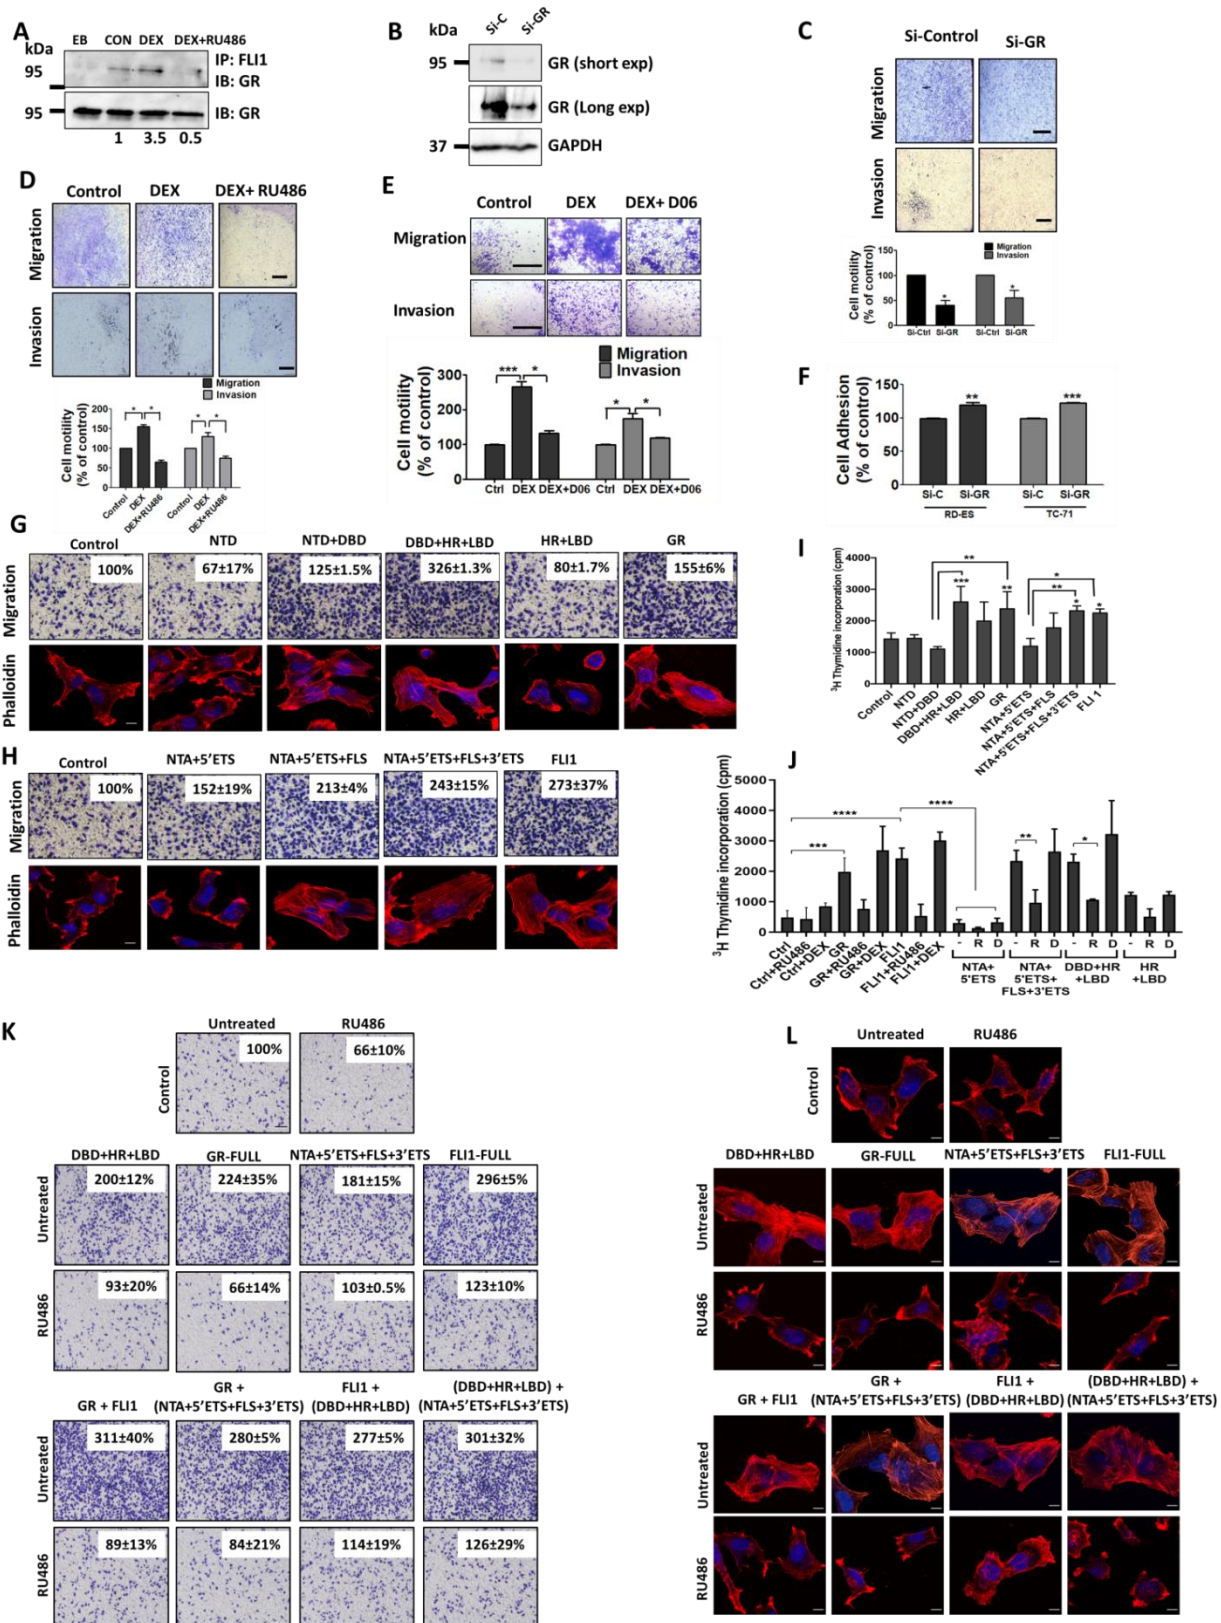



**Supplementary Figure S4 (related to Figure 4): GR of Ewing sarcoma cells physically associates with EWS-FLI1 and enhances cellular migration, DNA synthesis and actin filament reorganization.**

**(A)** Once RD-ES cells reached 70% confluence, they were starved overnight for serum factors. Thereafter, cells were treated in duplicates for 60 minutes with vehicle, DEX (1  $\mu$ M) or the combination of DEX and RU486 (each at 1  $\mu$ M). The cells were then extracted and lysates were processed for co-immunoprecipitation assays using an antibody against EWS-FLI1 and immunoblotting using an antibody specific to GR. The results shown are representative of two biological replicates. **(B)** RD-ES cells were seeded in 100-mm dishes. Once they reached 70% confluence, cells were transfected with siRNA oligonucleotides, either control siRNAs or oligonucleotides specific to GR. Cell extracts were prepared 24 hours later and probed for GR and GAPDH. Shown are short and long film exposures. **(C)** Control siRNAs or siRNAs specific to GR were added to RD-ES cells 24 hours prior to seeding in Transwell migration chambers or Matrigel invasion chambers. Cell migration/invasion was quantified 20 hours later. Representative microscope fields are shown along with the normalized signals. **(D)** RD-ES cells were seeded on the upper faces of migration/invasion chambers and incubated for 20 hours in full medium. DEX (1  $\mu$ M) or the combination of DEX and RU486 (each at 1  $\mu$ M) were added to the medium and 20 hours later we fixed and stained cells that migrated to the lower face of the intervening filters. Shown are representative images of the stained cells. The bar plots show quantification (using ImageJ) of areas covered by cells. \*,  $p < 0.05$ . Bars, 500  $\mu$ m. **(E)** Migration and invasion assays of CHLA9 cells were performed as in D except for the use of a non-steroidal GR antagonist (DO6; 10  $\mu$ M) instead of RU486. \*,  $p < 0.05$ ; \*\*\*,  $p < 0.001$ . Bars, 100  $\mu$ m. **(F)** 48-well plates were coated with Cultrex® RGF BME prior to seeding RD-ES and TC-71 cells, which were pre-transfected with si-GR or si-C. Unattached cells were removed 8 hours later and adherent cells were fixed with paraformaldehyde (4%), stained with crystal violet (0.1%) and the optical density (550 nm) was quantified in triplicates. \*\*,  $p < 0.01$ ; \*\*\*,  $p < 0.001$ . **(G and H)** A673 cells were transfected (or mock transfected, *Control*) with plasmids encoding the full-length forms of GR and FLI1, or the indicated deletion mutants (see schemes in Figs. S2). Twenty-four hours later, cells were subjected to migration assays (in duplicates) using Transwell chambers. Cells that migrated across the intervening filters of the chambers were counted in 5 non-overlapping microscope fields and the results are presented. Alternatively, transfected cells were fixed and stained with phalloidin and DAPI, to visualize actin fibers (red)

and nuclei (blue), respectively. **(I and J)** For thymidine incorporation assays, the medium of transfected cells was replaced with fresh serum-free medium containing  $^3\text{[H]}$ -thymidine (1  $\mu\text{Ci}$ ), along with vehicle, dexamethasone (*D*; 1  $\mu\text{M}$ ) or RU486 (*R*; 10  $\mu\text{M}$ ). Forty-eight hours later, cells were extracted and radioactivity incorporated into DNA was determined (in quadruplicates) using a scintillation counter. Results are presented as means  $\pm$  S.D. \*,  $p < 0.05$ ; \*\*,  $p < 0.05$ ; \*\*\*,  $p < 0.001$ ; \*\*\*\*,  $p < 0.0001$ . **(K and L)** Cells were transfected or co-transfected with the indicated plasmids and later incubated with RU486 (1  $\mu\text{M}$ ) or with vehicle, and their migration (**K**) and actin cytoskeleton (**L**) assayed as in G. Scale bars: 500  $\mu\text{m}$  (migration assays) or 20  $\mu\text{m}$  (phalloidin staining).

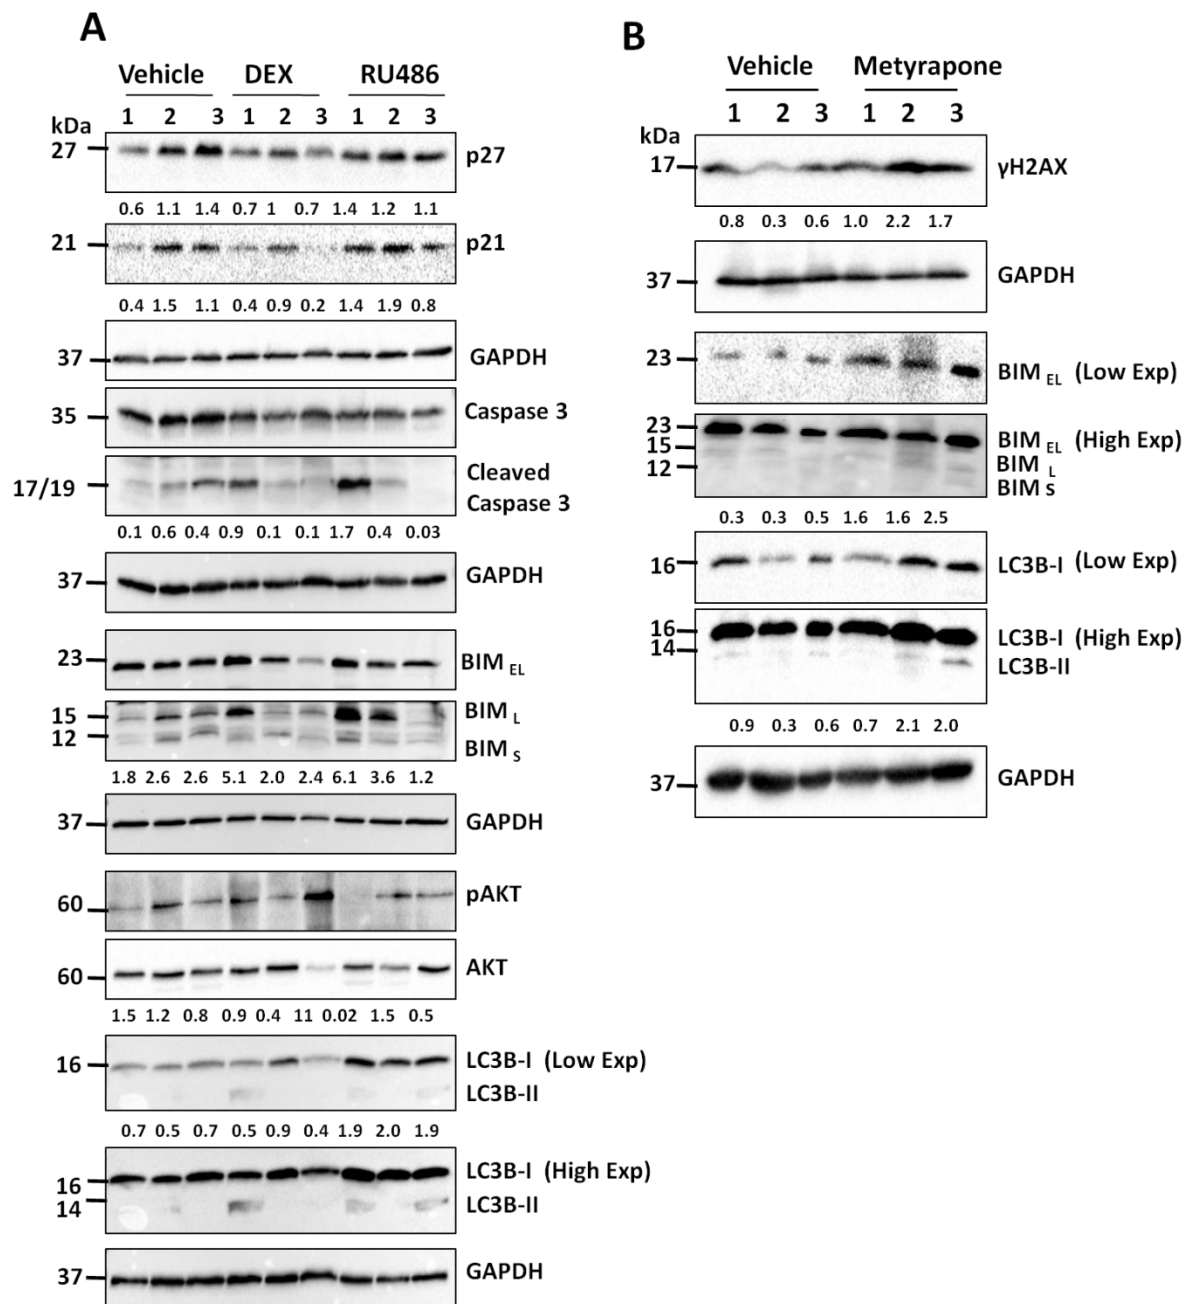

**Supplementary Figure S5 (related to Figures 5 and 6): A GR antagonist and a cortisol-lowering drug induce markers of cell death in Ewing sarcoma animal models. (A)** RD-ES tumors presented in Figure 6A were extracted and analyzed using immunoblotting with the indicated antibodies. **(B)** Whole extracts prepared from the tumors presented in Figure 6D were analyzed using immunoblotting with the indicated antibodies. Note that tumors from three different mice per group were analyzed.

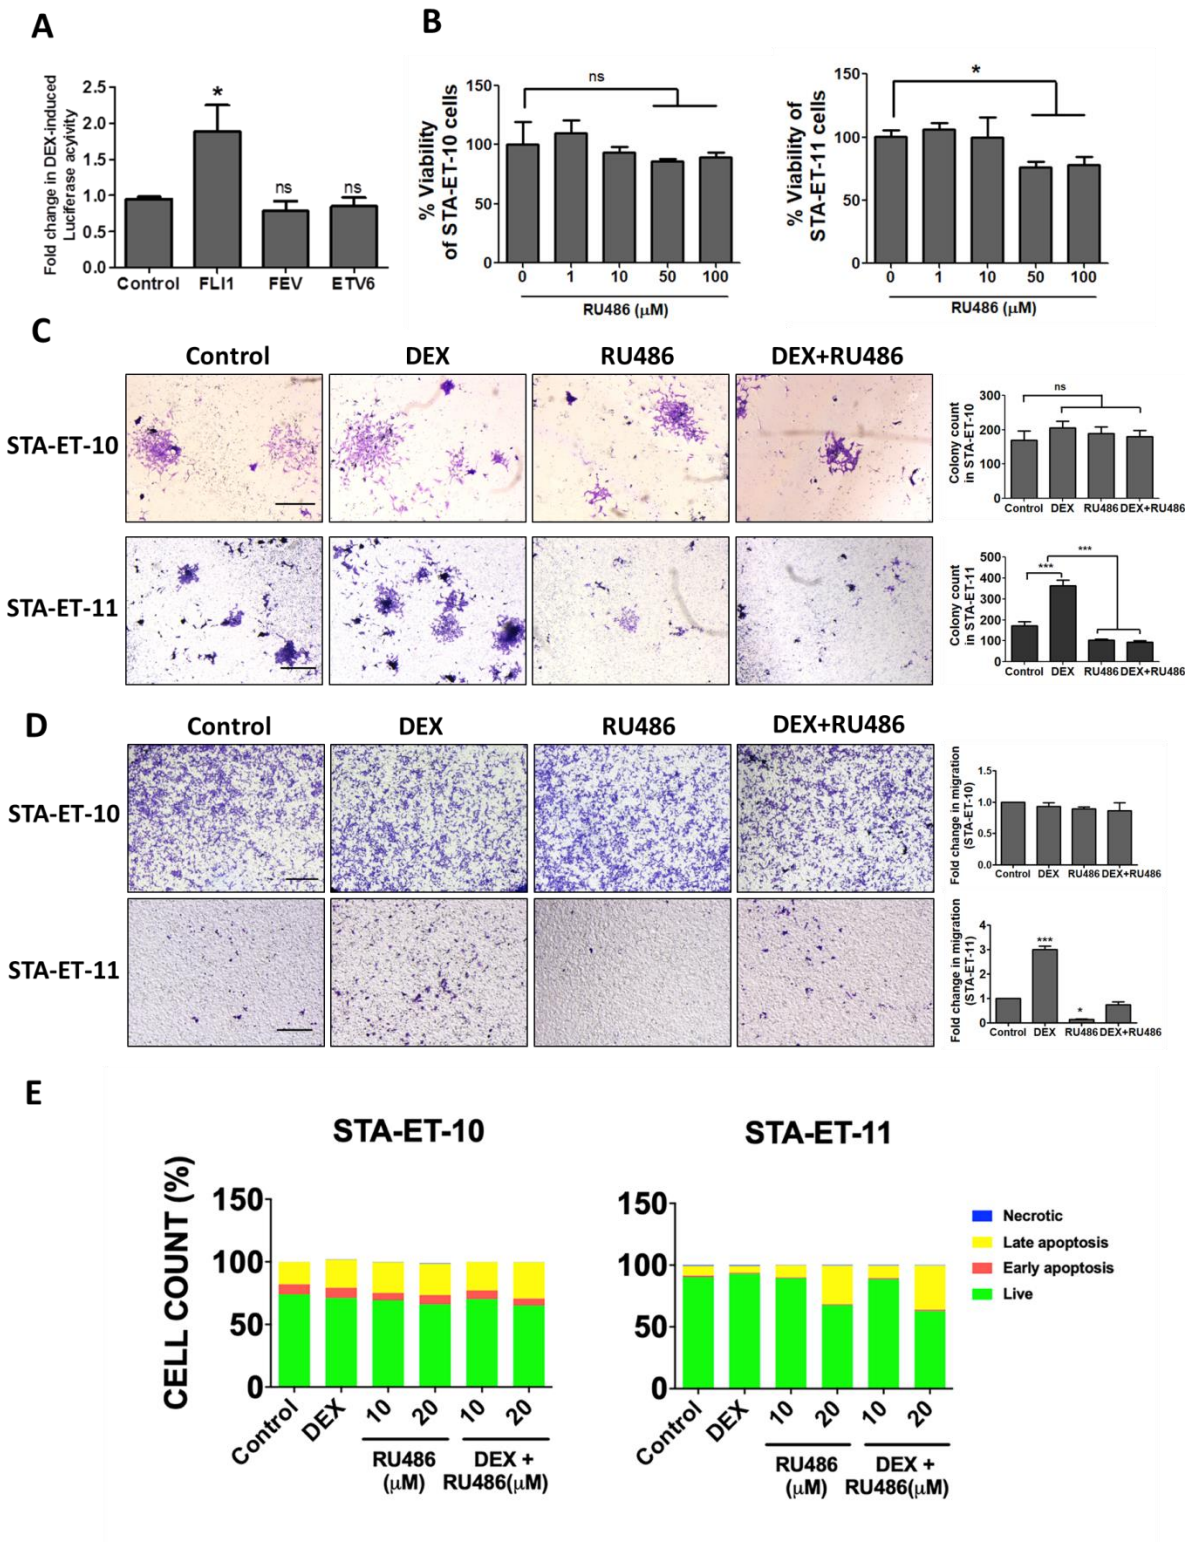

Supplementary Figure S6 (related to Figures 4 and 5): Unlike EWS-ERG expressing cells, colony formation, viability and migration of Ewing sarcoma cells expressing EWS-FEV are

**not regulated by GR.** (A) HEK293T cells pre-transfected (in sextuplicates) with GR-Gluc2 and the indicated Gluc1-ETS plasmids (FLI1, FEV and ETV6), were treated with either vehicle or DEX (1  $\mu$ M). Shown are normalized fold changes in luminescence (means  $\pm$  S.E.). \*,  $p \leq 0.05$ ; ns, not significant. (B) Ewing sarcoma cells ( $8 \times 10^3$ ), either STA-ET-10 (expressing an EWS-FEV fusion protein) or STA-ET-11 cells (expressing EWS-ERG), were seeded in 96-well plates and treated with either vehicle or with the indicated concentrations of RU486. Cell survival assays (MTT) were performed after 48 hours of treatment. The assay was repeated twice in quadruplets. \*,  $p < 0.05$ . ns, non-significant. (C) The indicated Ewing sarcoma cells were sparsely seeded in 6-well plates. Cells were later treated every other day with either vehicle, DEX (1  $\mu$ M), RU486 (10  $\mu$ M) or the combination. Ten days later, cells were fixed and stained with crystal violet. Photos are shown along with bar plots presenting the quantification of colonies in 5 non-overlapping microscope fields. The experiment was repeated twice. ns, non-significant; \*\*\*,  $p < 0.001$ . (D) The indicated cells were seeded in Transwell migration chambers. Cells were later treated with either DEX (1  $\mu$ M), RU486 (1  $\mu$ M) or the combination, and their ability to migrate was quantified 20 hours later. \*,  $p \leq 0.05$ ; \*\*\*,  $p \leq 0.001$ . Bars, 500  $\mu$ m. (E) The indicated cells were grown in 100-mm dishes. Thereafter, cells were treated for 48 hours with DEX (1  $\mu$ M) and/or RU486 (10 or 20  $\mu$ M). Shown are results of an apoptosis assay performed using an annexin V/7-AAD kit (from BioLegend). Data shown are representative of two biological repeats.

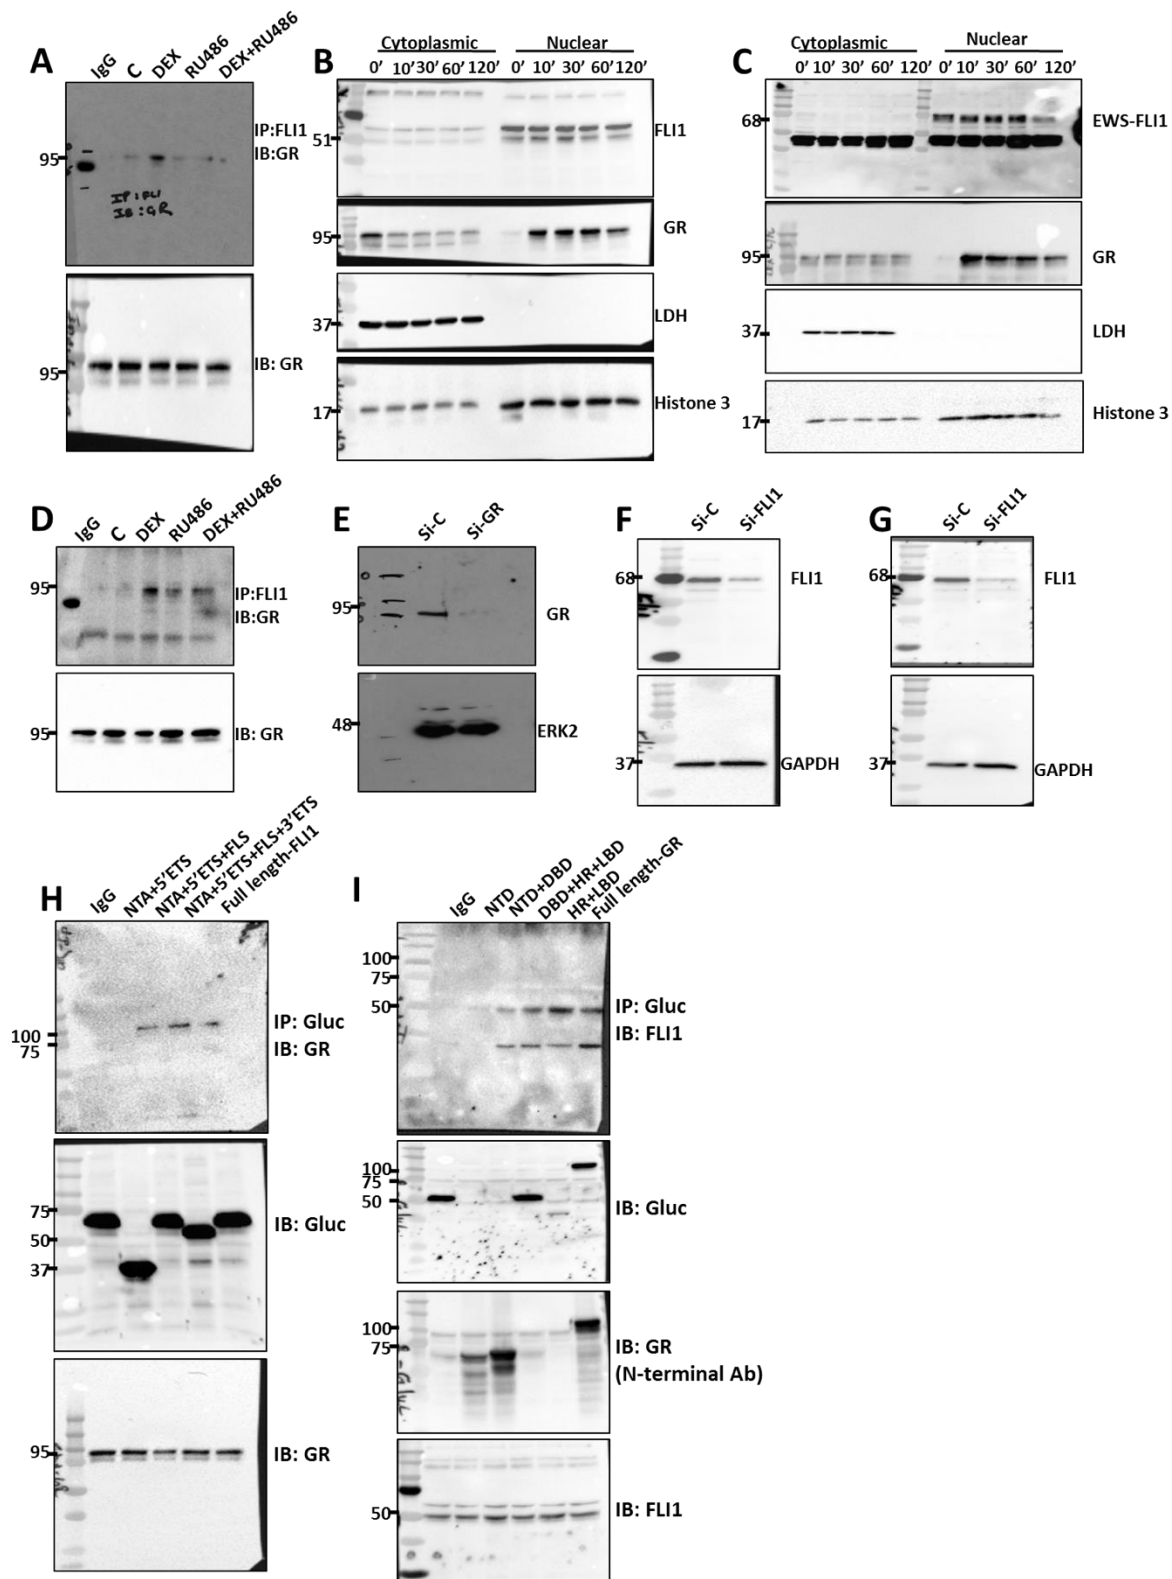

**Supplementary Figure S7 (related to Figures 1, 3, 4 and 5): Uncropped original blots of images shown in the main and supplementary figures of the manuscript.** Panels labeled A, B, C, D, E, F, G, H and I show the original, uncropped blots corresponding to the following Figures: 1D, 1G, 3B, 4A, 4B, 4E, 5C, 2SC and 2SD, respectively.

## Supplementary Tables

| No. | Gene        | Accession Number | X-GLuc1 | X-GLuc2 | GLuc1-X |
|-----|-------------|------------------|---------|---------|---------|
| 1   | GR          | NM_000176.2      | +       | +       |         |
| 2   | MR          | NM_000901.4      | +       | +       |         |
| 3   | ER $\beta$  | NM_001437.2      | +       | +       |         |
| 4   | ER $\alpha$ | NM_000125.3      | +       | +       |         |
|     |             |                  |         |         |         |
| 1   | PU.1        | NM_001080547.1   |         |         | +       |
| 2   | FLI1        | NM_002017.4      |         |         | +       |
| 3   | ELK3        | NM_005230.2      |         |         | +       |
| 4   | ERG         | NM_001136154.1   |         |         | +       |
| 5   | ELF3        | NM_001114309.1   |         |         | +       |
| 6   | SPIC        | NM_152323.1      |         |         | +       |
| 7   | ETV2        | NM_014209.3      |         |         | +       |
| 8   | ELK4        | NM_001973.3      |         |         | +       |
| 9   | GABPA       | NM_002040.3      |         |         | +       |
| 10  | ELK1        | NM_001114123.2   |         |         | +       |
| 11  | ETV4        | NM_001079675.2   |         |         | +       |
| 12  | ETV7        | NM_016135.3      |         |         | +       |
| 13  | ETV5        | NM_004454.2      |         |         | +       |
| 14  | ETV6        | NM_001987.4      |         |         | +       |
| 15  | ETS1        | NM_001143820.1   |         |         | +       |
| 16  | ETS2        | NM_001256295.1   |         |         | +       |
| 17  | FEV         | NM_017521.2      |         |         | +       |

**Supplementary Table S1: List of all constructs generated for PCA (related to Figure 1).**

Listed are seventeen cDNAs encoding either nuclear receptors (fused to the 5' end of *Gluc2*) or ETS family members (fused to the 3' end of *Gluc1*). The respective human genome accession numbers are indicated.

| <b>Gluc1-ETS primers</b> |                                                       |
|--------------------------|-------------------------------------------------------|
| PU.1-Fw                  | TGGTGGGTCCTCCGGATTACAGGCGTGCAAAATGGAAGGG              |
| PU.1-Rev                 | AAACGGGCCCTCTAGATCAGTGGGGCGGGTGGC                     |
| FLI1-Fw                  | TGGTGGGTCCTCCGGAGAC GGG ACT ATT AAG GAG GCT CTG TCG   |
| FLI1-Rev                 | AAACGGGCCCTCTAGACTA GTA GTA GCT GCC TAA GTG TGA AGG C |
| ELK3-Fw                  | TGGTGGGTCCTCCGGAGAG AGT GCA ATC ACG CTG TGG C         |
| ELK3-Rev                 | AAACGGGCCCTCTAGATCA GGA TTT CTG AGA GTT TGA AGA AAG   |



|                             |                                                                                              |
|-----------------------------|----------------------------------------------------------------------------------------------|
|                             | CAG TAC                                                                                      |
| ERG-Fw                      | TGGTGGGTCCTCCGGAATT CAG ACT GTC CCG GAC CCA GC                                               |
| ERG-Rev                     | AAACGGGCCCTCTAGATTA GTA GTA AGT GCC CAG ATG AGA AGG CA                                       |
| ELF3-Fw                     | TGGTGGGTCCTCCGAGCT GCA ACC TGT GAG ATT AGC AAC A                                             |
| ELF3-Rev                    | AAACGGGCCCTCTAGATCA GTT CCG ACT CTG GAG AAC CTC TTC C                                        |
| SPIC-Fw                     | TGGTGGGTCCTCCGGAACG TGT GTT GAA CAA GAC AAG CTG GG                                           |
| SPIC-Rev                    | AAACGGGCCCTCTAGATTA GCA ATC ATG GTG ATT TAG CTC ATG GTA ATT GG                               |
| ETV2-Fw                     | TGGTGGGTCCTCCGAGAC CTG TGG AAC TGG GAT GAG GC                                                |
| ETV-2Rev                    | AAACGGGCCCTCTAGATTA TTG TGT CTC TGC TCC CCG TCC G                                            |
| ELK4-Fw                     | TGGTGGGTCCTCCGAGAC AGT GCT ATC ACC CTG TGG CAG                                               |
| ELK4-Rev                    | AAACGGGCCCTCTAGATTA TGT CTT CTG TAG GTC TGG GGA AAA TGG G                                    |
| GABPA-Fw                    | TGGTGGGTCCTCCGGAAC AAA AGA GAA GCA GAG GAG CTG ATA GAA                                       |
| GABPA-Rev                   | AAACGGGCCCTCTAGATCA ATT ATC CTT TTC CGT TTG CAG AGA AGC                                      |
| ELK1-Fw                     | TGGTGGGTCCTCCGAGAC CCA TCT GTG ACG CTG TGG C                                                 |
| ELK1-Rev                    | AAACGGGCCCTCTAGATCA TGG CTT CTG GGG CCC TGG                                                  |
| ETV4-Fw                     | TGGTGGGTCCTCCGAGAG CGG AGG ATG AAA GCC GGA TAC                                               |
| ETV4-Rev                    | AAACGGGCCCTCTAGACTA GTA AGA GTA GCC ACC CTT GGG GC                                           |
| ETV7-Fw                     | TGGTGGGTCCTCCGACAG GAG GGA GAA TTG GCT ATT TCT CCT                                           |
| ETV7-Rev                    | AAACGGGCCCTCTAGATCA CGG AGA GAT TTC TGG CCT CTT GT                                           |
| ETV5-Fw                     | TGGTGGGTCCTCCGAGAC GGG TTT TAT GAT CAG CAA GTC CCT                                           |
| ETV5-Rev                    | AAACGGGCCCTCTAGATTA GTA AGC AAA GCC TTC GGC ATA GGG G                                        |
| ETV6-Fw                     | TGGTGGGTCCTCCGATCT GAG ACT CCT GCT CAG TGT AGC ATT AAG                                       |
| ETV6-Rev                    | AAACGGGCCCTCTAGATCA GCA TTC ATC TTC TTG GTA TAT TTG TTC ATC CAG                              |
| ETS1-Fw                     | TGGTGGGTCCTCCGGAAGC TAC TTT GTG GAT TCT GCT GGG AGC                                          |
| ETS1-Rev                    | AAACGGGCCCTCTAGATCA CTC GTC GGC ATC TGG CTT GAC                                              |
| ETS2-Fw                     | TGGTGGGTCCTCCGAGGG TCG GCT CAA TTT CAG GGC                                                   |
| ETS2-Rev                    | AAACGGGCCCTCTAGATCA GTC CTC CGT GTC GGG C                                                    |
| FEV-Fw                      | TGGTGGGTCCTCCGGA AGA CAG AGC GGC GCC TCC CAG CCC CTG CTG ATC AAC ATG TAC CTG CCA GAT CCC GTC |
| FEV-Rev                     | AAACGGGCCCTCTAGA TTA GTG GTA ATG GCC CCC CAA GTG CGA GGC TGC GGC CAC GGC CCC GAA GGG CCC GGG |
| NFκBp65-Fw                  | TGGTGGGTCCTCCGAGACGAACTGTTCCCCCTCATCTTCC                                                     |
| NFκBp65-Rev                 | AAACGGGCCCTCTAGATCACCCCCTTAGGAGCTGATCTGA                                                     |
| <b>Primers for NR-Gluc2</b> |                                                                                              |
| GR-Fw                       | AGCACAGTGGCGGCCGCATG GAC TCC AAA GAA TCA TTA ACT CCT GGT AGA G                               |
| GR-Rev                      | CCACCGCCACCATCGATCTT TTG ATG AAA CAG AAG TTT TTT GAT ATT TCC                                 |

|                           |                                                                                      |
|---------------------------|--------------------------------------------------------------------------------------|
| MR-Fw                     | AGCACAGTGGCGGCCGCATG GAG ACC AAA GGC TAC CAC AGT CTC<br>C                            |
| MR-Rev                    | CCACCGCCACCATCGATCTT CCG GTG GAA GTA GAG CGG C                                       |
| ER $\alpha$ -Fw           | AGCACAGTGGCGGCCGCATGACCATGACCCTCCACACCAAAGC                                          |
| ER $\alpha$ -Rev          | CCACCGCCACCATCGATGACCGTGGCAGGGAACCCTCTGCCTCC                                         |
| ER $\beta$ -Fw            | AGCACAGTGGCGGCCGCATGGATATAAAAAACTCACCATCTAGCCTT<br>AATTCTCCTTCC                      |
| ER $\beta$ -Rev           | CCACCGCCACCATTTCGATCTGAGACTGTGGGTTCTGGGAGCCCTCTTT<br>GC                              |
| <b>GR domains-GLuc2</b>   |                                                                                      |
| NTD-Fw                    | AGCACAGTGGCGGCCGC ATG GAC TCC AAA GAA TCA TTA ACT CCT<br>GGT AGA GAA GAA AAC CCC     |
| NTD-Rev                   | CCACCGCCACCATCGAT CTT GAA TAG CCA TTA GAA AAA ACT GTT<br>CGA CCA GGG                 |
| NTD+DBD-Fw                | same as NTD-Fw                                                                       |
| NTD+DBD-Rev               | CCACCGCCACCATCGAT CTT CCA GGT TCA TTC CAG CCT GAA GAC<br>ATT                         |
| DBD+HR+LBD-Fw             | AGCACAGTGGCGGCCGC ATG AGC CCC AGC ATG AGA CCA GAT GTA<br>AGC TCT                     |
| DBD+HR+LBD-Rev            | CCACCGCCACCATCGAT CTT TTG ATG AAA CAG AAG TTT TTT GAT<br>ATT TCC ATT TGA ATA TTT TGG |
| HR+LBD-Fw                 | AGCACAGTGGCGGCCGC ATG GCT CGA AAA ACA AAG AAA AAA<br>ATA AAA GGA ATT CAG CAG GC      |
| HR+LBD-Rev                | same as DBD+HR+LBD-Rev                                                               |
| <b>Gluc1-FLI1 domains</b> |                                                                                      |
| NTA+5'ETS-Fw              | TGGTGGGTCTCTCCGAGACGGGACTATTAAGGAGGCTCTGTCCG                                         |
| NTA+5'ETS-Rev             | AAACGGGCCCTCTAGATTATTTCCCTGAGGTAAGTACTGAGGTGTGACAAC<br>AGC                           |
| NTA+5'ETS+FLS-Fw          | same as NTA+5'ETS-Fw                                                                 |
| NTA+5'ETS+FLS-Rev         | AAACGGGCCCTCTAGATTAGGAGAGCAGCTCCAGGAGGAATTGCCAC<br>AG                                |
| NTA+5'ETS+FLS+3'ETS-Fw    | same as NTA+5'ETS-Fw                                                                 |
| NTA+5'ETS+FLS+3'ETS-Rev   | AAACGGGCCCTCTAGATTACTGCTGGTGGGCATGGTAGGA                                             |

**Supplementary Table S2: List of all primers used for cloning and validation (related to Figure 1).** Fw, forward primer; Rev, reverse primer.

| Downregulated genes | Upregulated genes |           |            |
|---------------------|-------------------|-----------|------------|
| AC016612.1          | ABI3BP            | EIF3J-AS1 | PLAT       |
| AL365440.1          | AC008938.1        | ENC1      | PLAU       |
| AL844908.1          | AC025857.2        | EPGN      | PLK2       |
| AP000924.1          | AC099673.1        | EREG      | PODXL      |
| CALM1               | ACTA2             | ERRFI1    | PPFIBP1    |
| CD83                | ADGRF5            | EVA1A     | PRSS23     |
| CLDN1               | ADGRG1            | F3        | PTGR1      |
| CNTNAP2             | ADM               | FBN1      | PTX3       |
| CXCL10              | AL050341.1        | FCRL1     | RAI14      |
| DNAL4               | ANKRD1            | FN1       | RHBDL2     |
| FAM19A5             | AP000753.1        | FNDC3B    | RN7SL125P  |
| FAM84B              | AREG              | FOSL2     | RNU6-1092P |
| FDX1                | ARHGAP29          | GNAI1     | RUNX2      |
| FEZF1               | ATP1B1            | GPC6      | S100A10    |
| FEZF1-AS1           | ATP2B1            | HHIPL2    | S100A13    |
| H2AFY2              | BEND2             | ID1       | S100A16    |
| HMGB1               | BST1              | IGFBP3    | S100A2     |
| HOOK1               | C15orf48          | IGFBP5    | S100A4     |
| IRS2                | CALD1             | IGFBP7    | S100A5     |
| KLHL23              | CCL2              | IL18      | S100A6     |
| LBH                 | CCL5              | IL6       | S1PR3      |
| MCM4                | CD44              | ITPR2     | SEC14L2    |
| MYOM2               | CDH13             | KANK2     | SERPINE1   |
| NR0B1               | CFI               | KYNU      | SH3BP5     |
| OTX2                | CH25H             | L1CAM     | SH3KBP1    |
| PRKCB               | CHI3L1            | LAMA4     | SIX1       |
| SLAIN1              | CLDN11            | LAMC1     | SMAD3      |
| SLC5A6              | COL12A1           | LGALS3    | SRGN       |
| TRAV1-2             | COL1A1            | LOX       | SYNJ2      |
| UGT3A2              | COL1A2            | LOXL2     | TAGLN      |
| YPEL5               | COL3A1            | LRRC17    | TFPI2      |
| OTX2                | COL4A1            | MDGA2     | TGFB2      |
| PRKCB               | COL6A1            | MEST      | TGFB2-OT1  |
| SLAIN1              | CPA4              | MGP       | TGFBI      |
| SLC5A6              | CREB3L1           | MIR21     | TGFBR2     |
| TRAV1-2             | CRYAB             | MIR503    | TIMP2      |
| UGT3A2              | CSF2              | MIR503HG  | TM4SF1     |

|       |        |        |          |
|-------|--------|--------|----------|
| YPEL5 | CTGF   | MLPH   | TMEM200A |
|       | CTSB   | MRPS6  | TMSB4X   |
|       | CTSO   | MYL6   | TNFSF18  |
|       | CXCL1  | NAMPT  | TPM1     |
|       | CXCL6  | NAV3   | TRHR     |
|       | CYP1B1 | NT5E   | UGCG     |
|       | CYR61  | P4HA2  | VCAM1    |
|       | DCBLD2 | PDP1   | VEGFC    |
|       | DISP2  | PENK   | VIM      |
|       | DKK1   | PHLDA1 | ZFP36L1  |
|       | DKK3   | PHLDB2 | ZFP36L2  |
|       | DST    |        |          |

**Supplementary Table S3: List of down- or up-regulated genes in FLI1-depleted Ewing sarcoma cells (related to Supplementary Figure S3).** A673 cells grown in 90-mm dishes were transfected in triplicates with siRNA oligonucleotides specific to FLI1, or with control oligonucleotides. Forty-eight hours later, cells were harvested and RNA was isolated and sequenced.
